# Supplementary material
Source: ML conference proceedings conference paper supplement (https://openaccess.thecvf.com/content/CVPR2022/html/Liu_Spatial-Temporal_Parallel_Transformer_CVPR_2022_paper.html)
Supplement: Supplementary file 1 [file Liu_Spatial-Temporal_Parallel_Transformer_CVPR_2022_supplemental.pdf]

# Spatial-Temporal Parallel Transformer for Arm-Hand Dynamic Estimation (Supplementary Material)

Shuying Liu, Wenbin Wu, Jiaxian Wu, Yue Lin  
NetEase Games AI Lab, Guangzhou, China

{liushuying, wuwenbin02, wujiaxian, gzlinyue}@corp.netease.com

Table 1. Network architecture of 2D hand key-point estimator. Each line represents a group of identical layers, repeating n times. All layers in the same group have the same number of output channels c. The first layer of each group has a stride s. And t is the expansion factor of the bottleneck.

| Input      | Operator   | t | c   | n  | s |
|------------|------------|---|-----|----|---|
| 224*224*3  | Conv3x3    | - | 32  | 1  | 2 |
| 112*112*32 | DWConv3x3  | - | 32  | 1  | 1 |
| 112*112*32 | Bottleneck | 2 | 32  | 4  | 2 |
| 56*56*32   | Bottleneck | 2 | 64  | 5  | 2 |
| 28*28*64   | Bottleneck | 4 | 128 | 14 | 2 |
| 14*14*128  | Conv1x1    | - | 21  | 1  | 1 |

## 1. Architecture of 2D Hand Key-points Estimator

The architecture of 2D hand key-point estimator is searched using SPOS-NAS [2], Tabel 1 shows the detailed configuration.

## 2. Dataset

Fig 1 shows sample frames of our motion capture dataset. We retarget the mocap data to the MIXAMO ybot character [1]. Fig 2 shows sample frames of the rendered dataset. We choose 3 human-look characters [1](Leonard, Stefani, Pete) and some in-the-wild background pictures to simulate in-the-wild videos of human motions.

## 3. Architecture Parameter Analysis

We investigate different parameters of network architecture to search for a optimal setting. Experiments involve parameters of t\_depth, t\_head and s\_depth, and results can be found in Table 2. The best combination of these parameters for our task is t\_depth=6, t\_head=8, s\_depth=2.

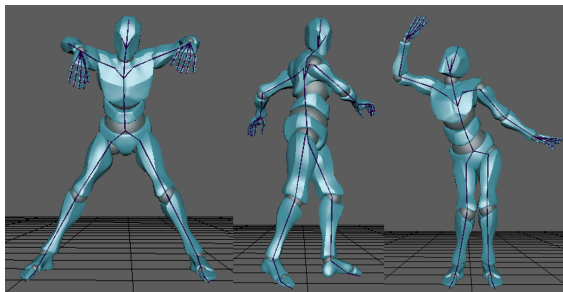

Figure 1. Samples of our motion capture dataset.

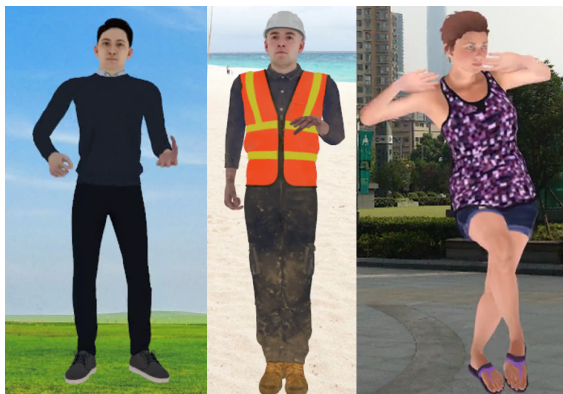

Figure 2. Samples of our rendered dataset.

## References

- [1] Mixamo. animate 3d characters for games, film, and more. <http://https://www.mixamo.com>. Accessed: 2021-09-30. 1
- [2] Zichao Guo, Xiangyu Zhang, Haoyuan Mu, Wen Heng, Zechun Liu, Yichen Wei, and Jian Sun. Single path one-shot neural architecture search with uniform sampling. In *European Conference on Computer Vision*, pages 544–560. Springer, 2020. 1

Table 2. Ablation study on different model parameters in constructing PAHMT. Evaluation is conducted on our motion capture dataset and MPJPE is reported.  $t\_depth$  and  $t\_head$  is the layer number and multi-head self-attention head number of the temporal transformer encoder;  $s\_depth$  is the layer number of spatial transformer encoder.

| $t\_depth$ | $t\_head$ | $s\_depth$ | MPJPE↓        |
|------------|-----------|------------|---------------|
| 6          | 8         | 2          | <b>0.0274</b> |
| 4          | 8         | 2          | 0.0295        |
| 8          | 8         | 2          | 0.0486        |
| 6          | 4         | 2          | 0.0333        |
| 6          | 16        | 2          | 0.0305        |
| 6          | 8         | 1          | 0.0338        |
